# Supplementary material
Source: PubMed Central journal article supplement (PMC4502809)

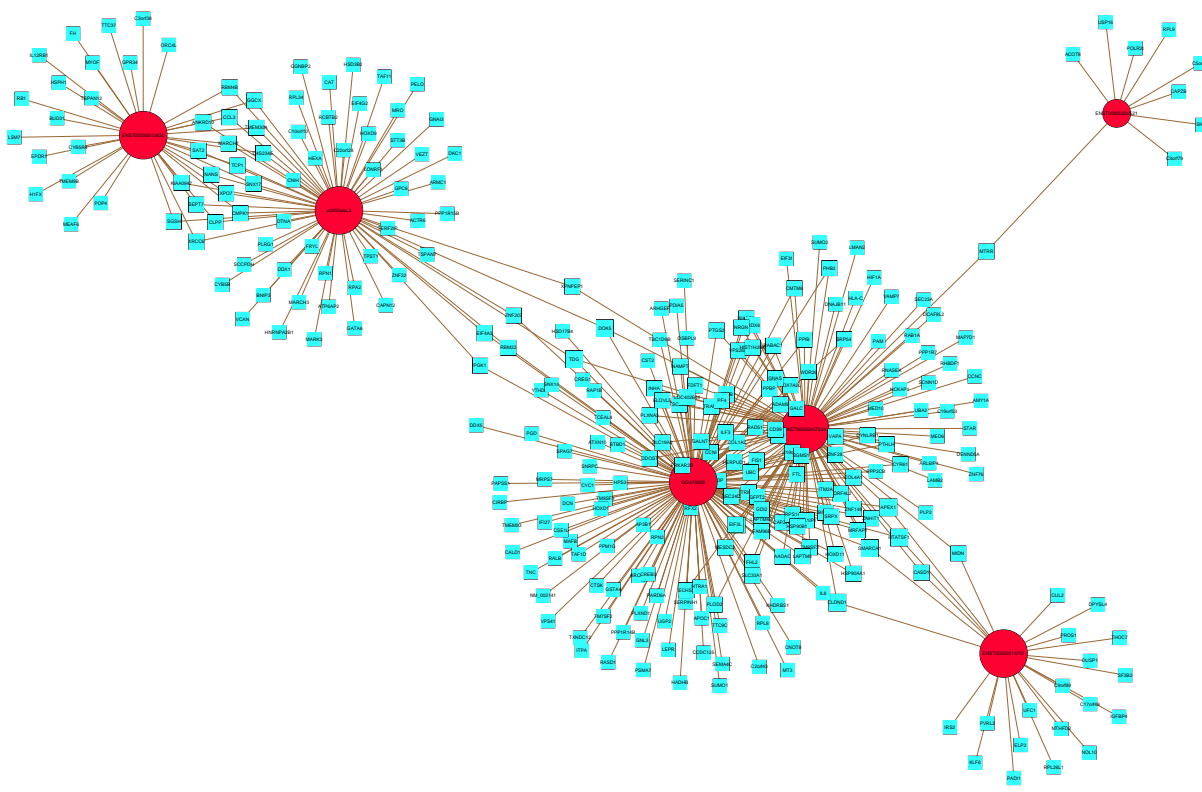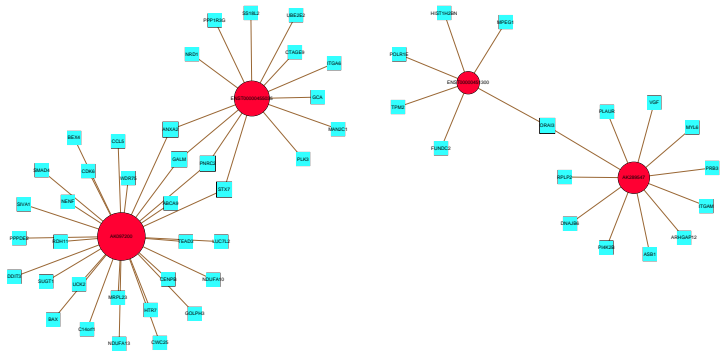

Supplement: Table_S3.pdf [file Table_S3.pdf]
